# Supplementary material for: Perovskite LaFeO3/montmorillonite nanocomposites: synthesis, interface characteristics and enhanced photocatalytic activity
Source: PubMed Central journal article supplement (PMC4726031; doi:10.1038/srep19723), 2016-01-18
Supplement: srep19723-s1.pdf [file srep19723-s1.pdf]

# Supplementary Information

## Perovskite LaFeO<sub>3</sub>/montmorillonite nanocomposites: synthesis, interface characteristics and enhanced photocatalytic activity

Kang Peng, Liangjie Fu, Huaming Yang<sup>\*</sup>, Jing Ouyang<sup>\*</sup>

**Table S1** The material formulation for the samples.

| Samples                     | La(NO <sub>3</sub> ) <sub>3</sub> ·6H <sub>2</sub> O<br>(mol) | Fe(NO <sub>3</sub> ) <sub>3</sub> ·9H <sub>2</sub> O<br>(mol) | Co(NO <sub>3</sub> ) <sub>3</sub> ·6H <sub>2</sub> O<br>(mol) | Ni(NO <sub>3</sub> ) <sub>3</sub> ·6H <sub>2</sub> O<br>(mol) | Citric acid<br>(mol) | MMT<br>(g) |
|-----------------------------|---------------------------------------------------------------|---------------------------------------------------------------|---------------------------------------------------------------|---------------------------------------------------------------|----------------------|------------|
| LaFeO <sub>3</sub> /MMT     | 0.005                                                         | 0.005                                                         | 0                                                             | 0                                                             | 0.010                | 2.000      |
| LaCoO <sub>3</sub> /MMT     | 0.005                                                         | 0                                                             | 0.005                                                         | 0                                                             | 0.010                | 2.000      |
| LaNiO <sub>3</sub> /MMT     | 0.005                                                         | 0                                                             | 0                                                             | 0.005                                                         | 0.010                | 2.000      |
| La(FeCo)O <sub>3</sub> /MMT | 0.005                                                         | 0.0025                                                        | 0.0025                                                        | 0                                                             | 0.010                | 2.000      |
| La(FeNi)O <sub>3</sub> /MMT | 0.005                                                         | 0.0025                                                        | 0                                                             | 0.0025                                                        | 0.010                | 2.000      |
| La(CoNi)O <sub>3</sub> /MMT | 0.005                                                         | 0                                                             | 0.0025                                                        | 0.0025                                                        | 0.010                | 2.000      |
| LaFeO <sub>3</sub> /MMT-0.5 | 0.0025                                                        | 0.0025                                                        | 0                                                             | 0                                                             | 0.005                | 2.000      |
| LaFeO <sub>3</sub> /MMT-2   | 0.010                                                         | 0.010                                                         | 0                                                             | 0                                                             | 0.020                | 2.000      |
| LaFeO <sub>3</sub>          | 0.005                                                         | 0.005                                                         | 0                                                             | 0                                                             | 0.010                | 0          |

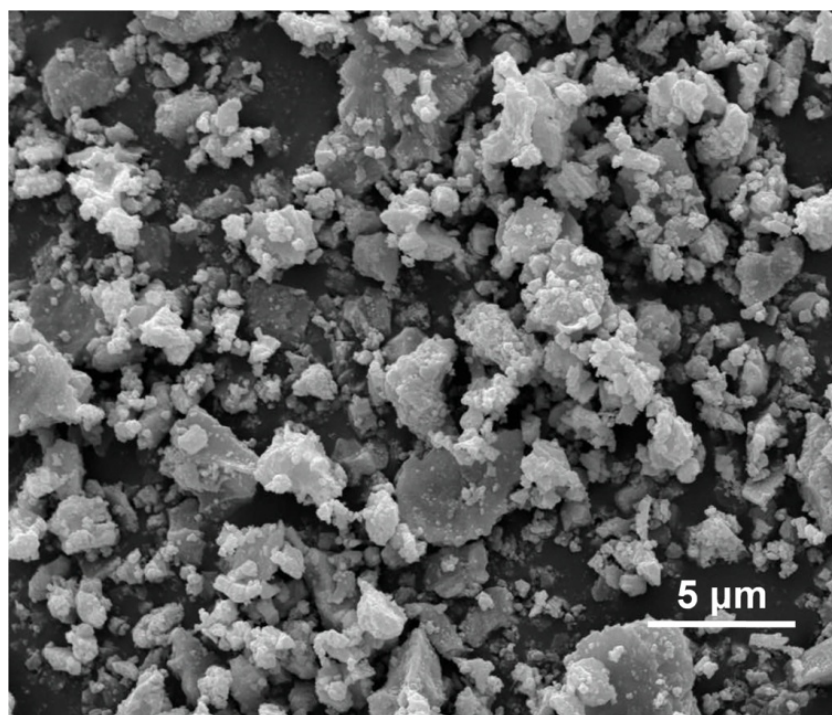

**Figure S1** SEM image of LaFeO<sub>3</sub>.

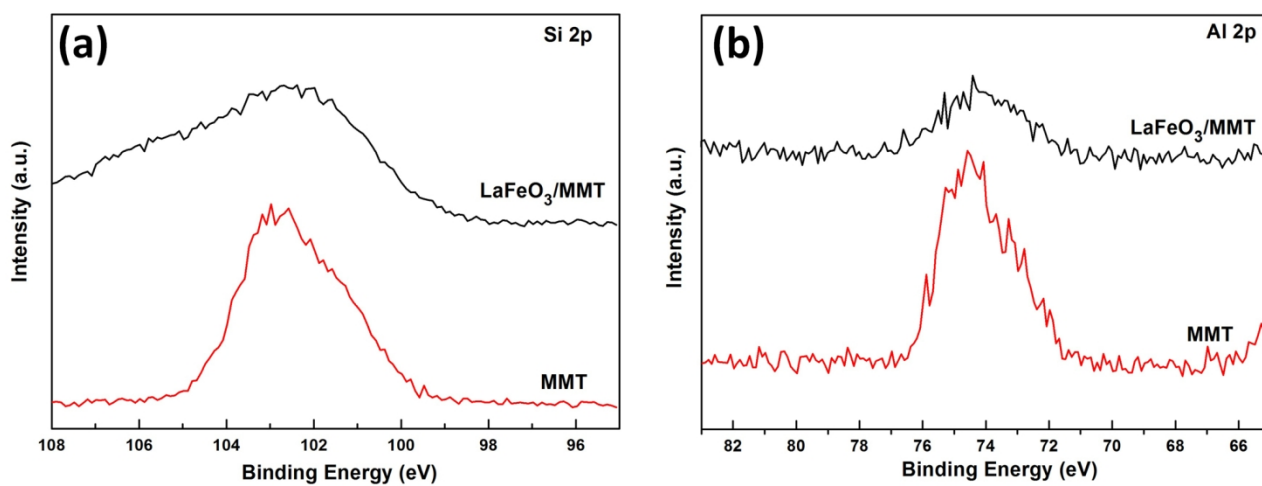

**Figure S2** (a) Si 2p and (b) Al 2p XPS spectra of MMT and LaFeO<sub>3</sub>/MMT.

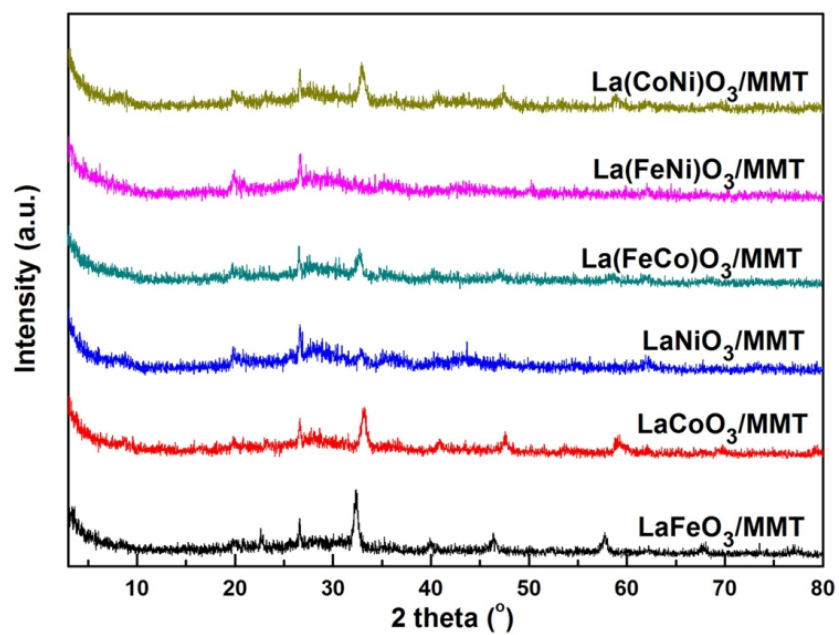

**Figure S3** XRD patterns of  $\text{LaMO}_3/\text{MMT}$  ( $M=\text{Fe,Co,Ni}$ ).

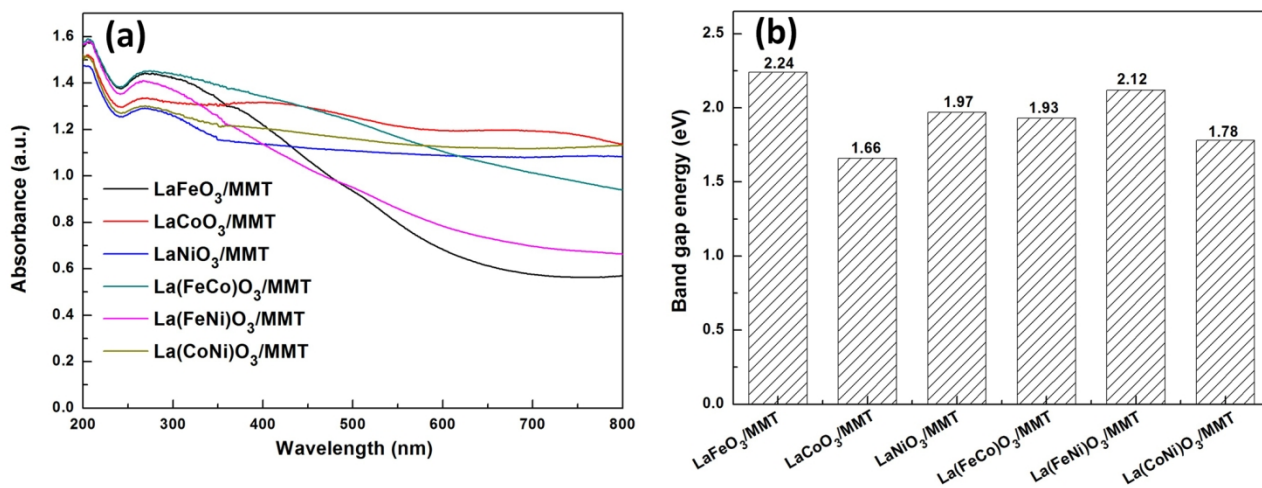

**Figure S4** (a) UV-vis diffuse reflectance spectra and (b) band gap energies of  $\text{LaMO}_3/\text{MMT}$  ( $M=\text{Fe,Co,Ni}$ ).

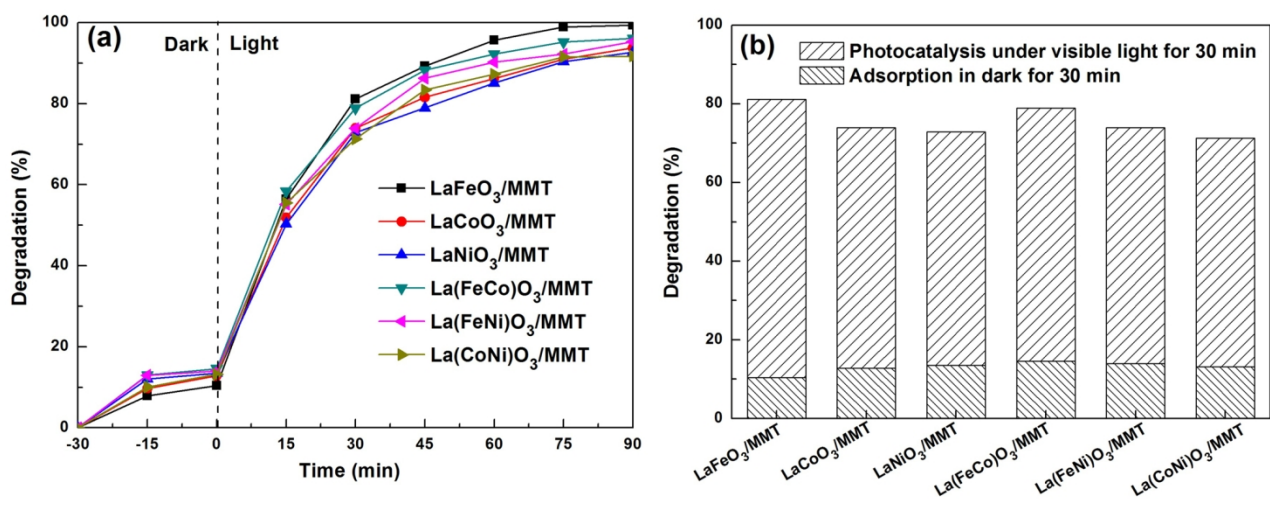

**Figure S5** (a) Photocatalytic degradation of RhB with LaMO<sub>3</sub>/MMT (M=Fe,Co,Ni), (b)

Photocatalytic activities compare of LaMO<sub>3</sub>/MMT.

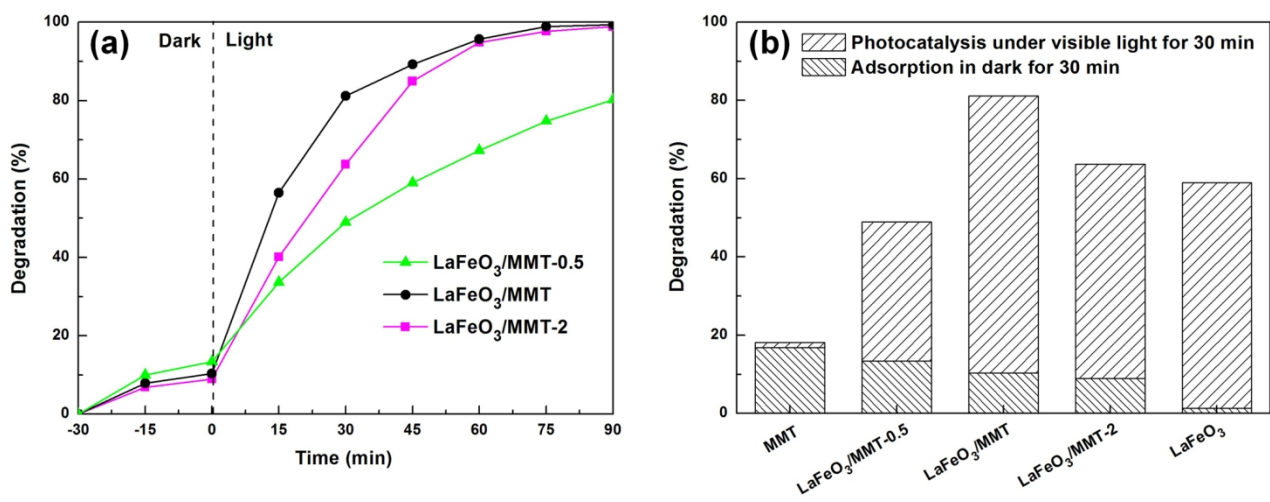

**Figure S6** (a) Photocatalytic degradation of RhB with LaFeO<sub>3</sub>/MMT-0.5, LaFeO<sub>3</sub>/MMT and

LaFeO<sub>3</sub>/MMT-2, (b) Photocatalytic activities compare of MMT, LaFeO<sub>3</sub>/MMT-0.5, LaFeO<sub>3</sub>/MMT,

LaFeO<sub>3</sub>/MMT-2 and LaFeO<sub>3</sub>
